# Supplementary material
Source: Springer Nature journal article supplement (https://www.springermedizin.de/resource/supplementary/12885_2014_4747_MOESM3_ESM.pdf/9467184)

**A** KB KB/CDDP(T)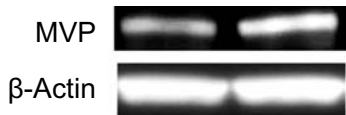**B** siControl siMVP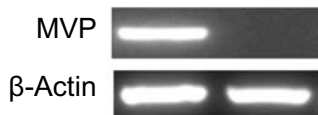**C** siControl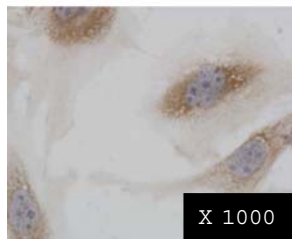

siMVP

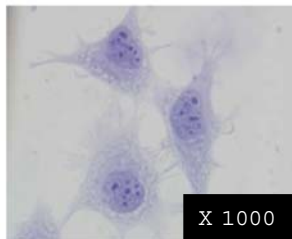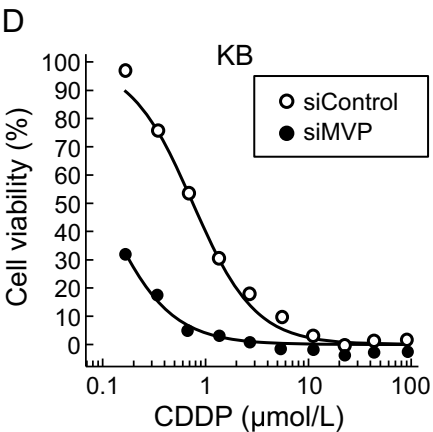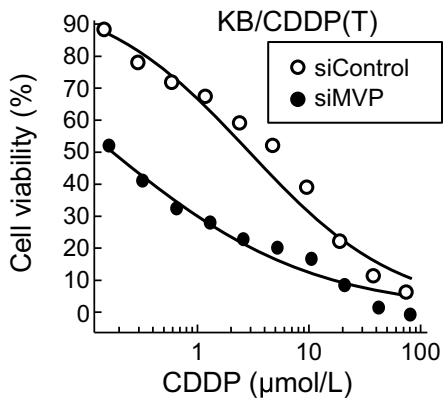

Supplement: MOESM3 [file 9467184]
